# Supplementary material for: Differential Regulation of POC5 by ERα in Human Normal and Scoliotic Cells
Source: MDPI journal article supplement (doi:10.3390/genes14051111), 2023-05-19
Supplement: s1 [file s1]

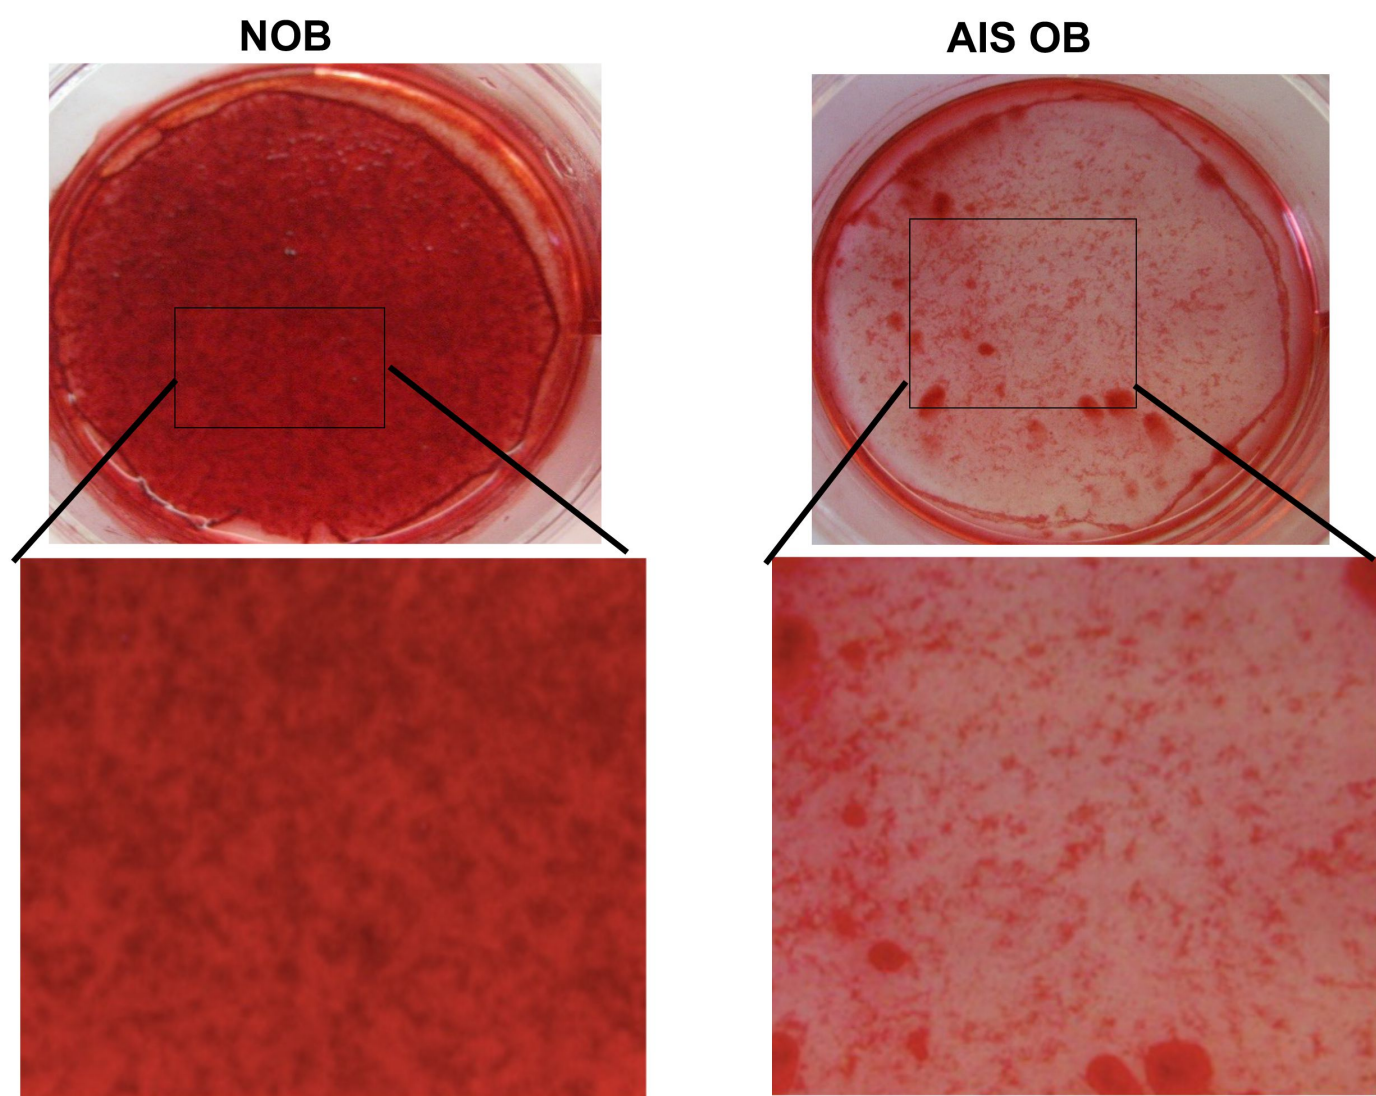

**Figure S1 Alizarin red staining.** Microscopic view of osteoblasts (OB) from normal (NOB) and AIS patients stained with alizarin red. There is reduced mineral deposition in the AIS cells compared to NOB cells.

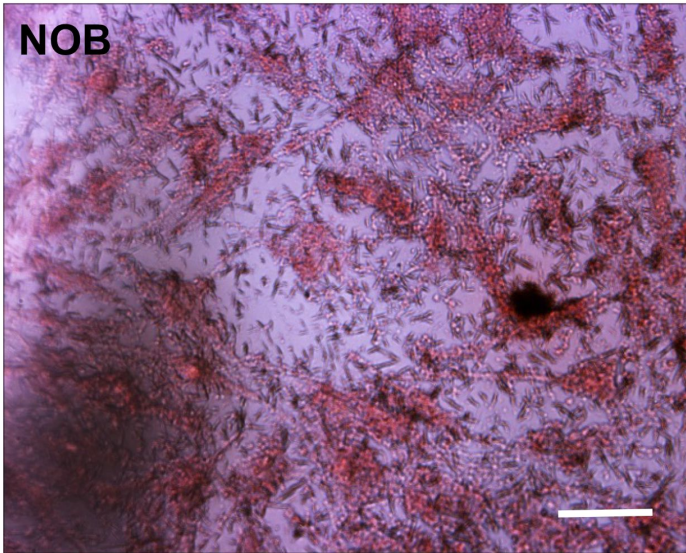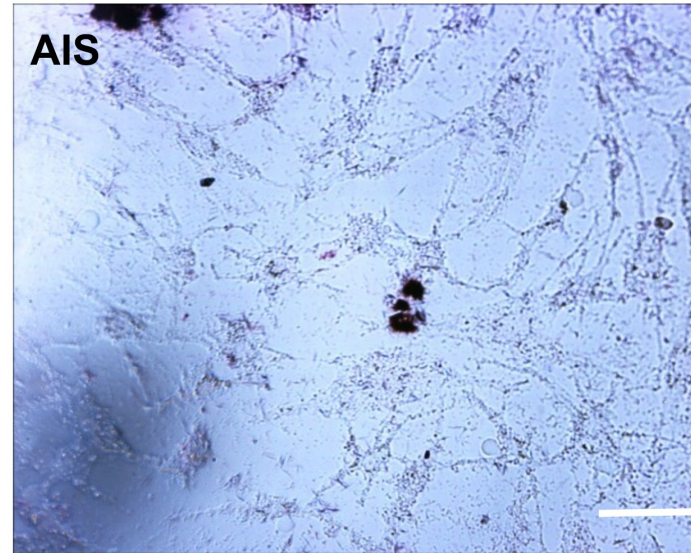

**Figure S2 Alkaline phosphatase staining of NOB and AIS cells.** Cells were fixed and stained to detect ALP as described in materials and methods. There is stronger staining in NOB cells than in AIS cells. Mag x20, Scale bar 20 $\mu$ m

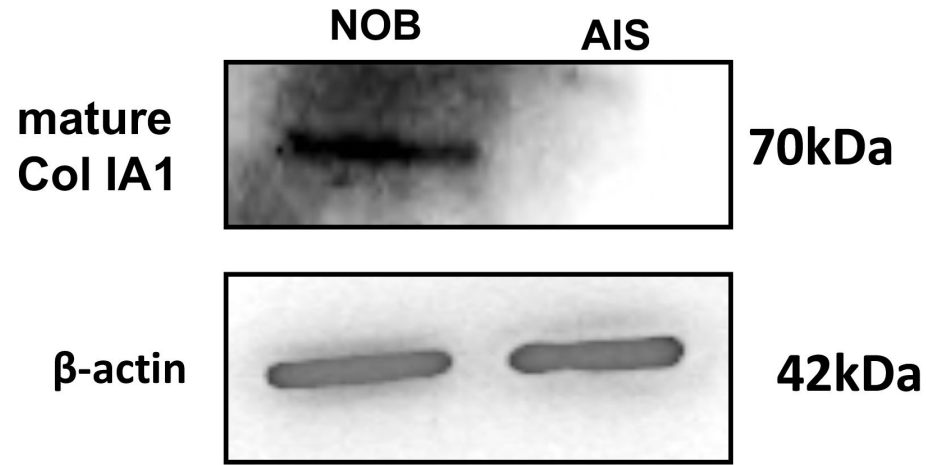

**Figure S3 Collagen1A1 protein expression in NOB and AIS cells.** AIS cells have lower expression levels of the mature forms of Col1A1

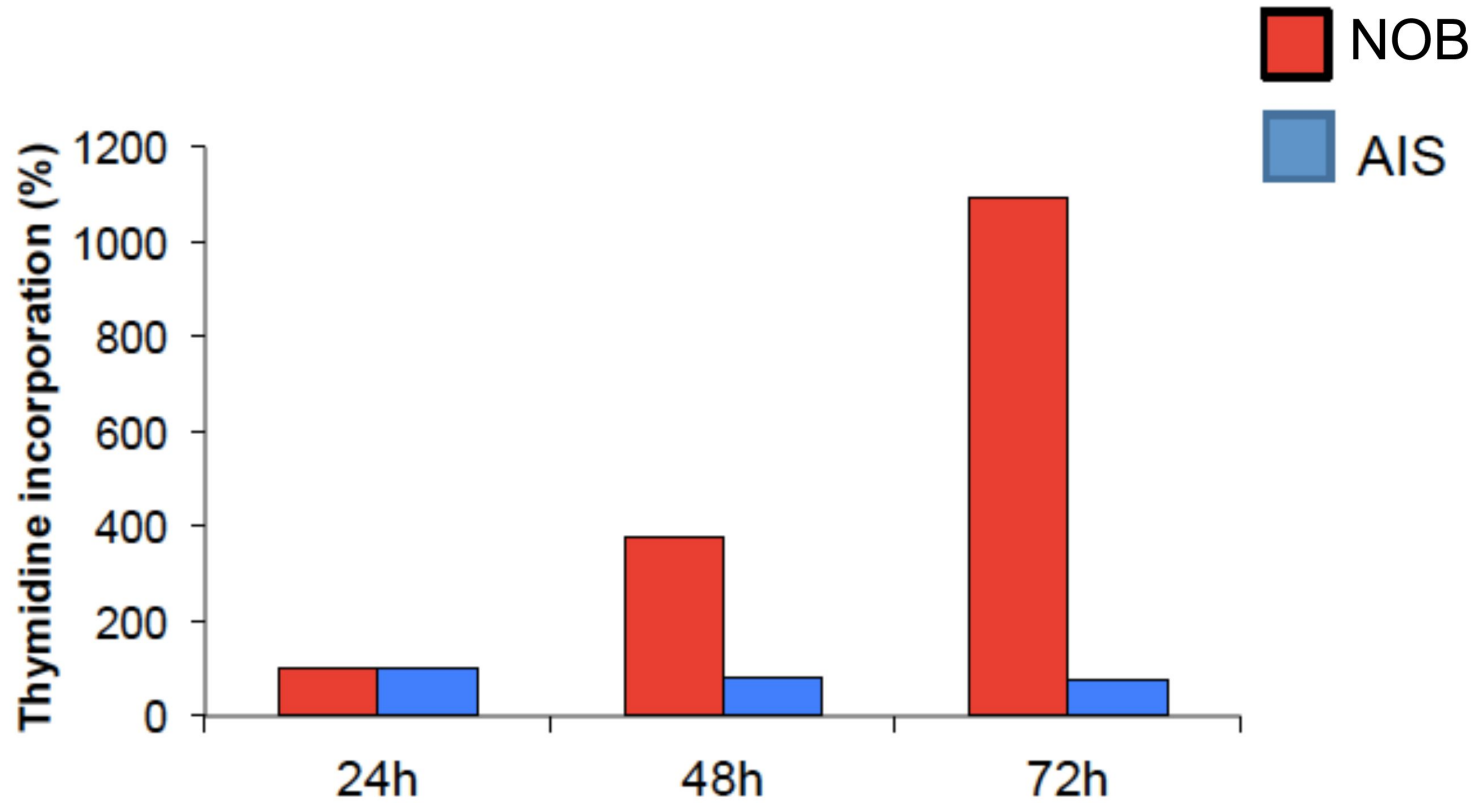

**Figure S4 ATP incorporation assay.** Proliferation of NOB and AIS cells was determined at different time points (24h, 48h and 72h). AIS cells have delayed proliferation rate compared to NOB cells.
